# Supplementary material for: Synthesis, photophysical and nonlinear optical properties of push–pull tetrazoles
Source: Royal Society of Chemistry journal article supplement (doi:10.1039/d2ra04307f), 2022-01-01
Supplement: d2ra04307f1.pdf [file d2ra04307f1.pdf]

**Electronic Supplementary Information**

**Synthesis, photophysical and non-linear optical properties of push-pull tetrazoles**

Anna-Kay West, Lukas J. Kaylor, Mahamud Subir and Sundeep Rayat\*

*Department of Chemistry, Ball State University, Foundational Sciences Building, Muncie, IN  
47306, United States.*

*Email: [srayat@bsu.edu](mailto:srayat@bsu.edu)*

(a)

**1a** is insoluble in toluene

(b)

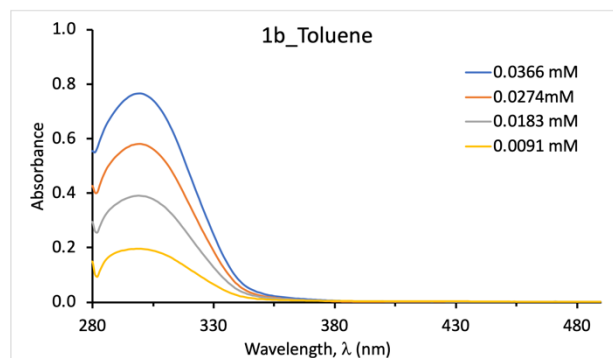

(c)

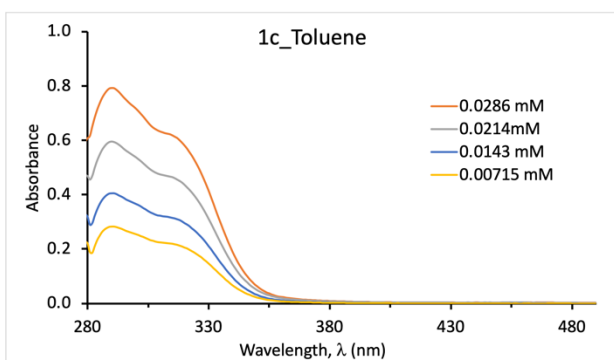

(d)

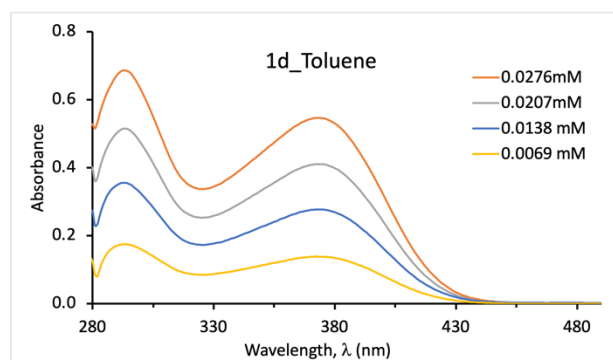

**Figure S1.** Absorption spectra of **1b – d** in toluene (x-axis begins at solvent cut-off).

(a)

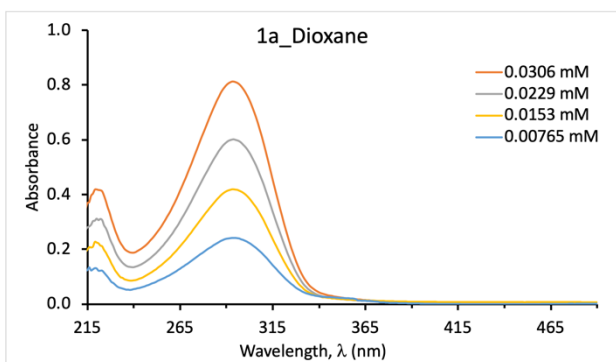

(b)

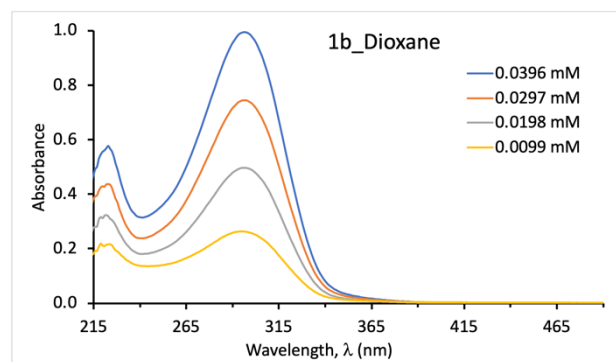

(c)

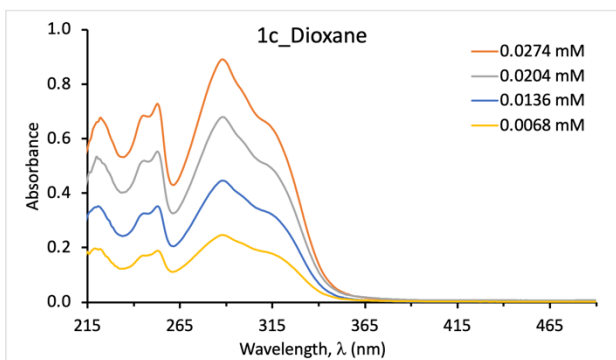

(d)

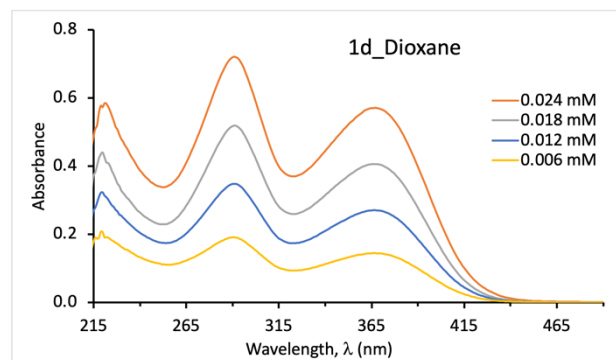

**Figure S2.** Absorption spectra of **1a – d** in 1,4-dioxane (x-axis begins at solvent cut-off).

(a)

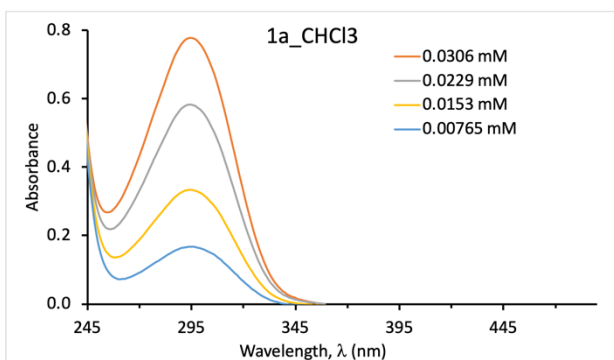

(b)

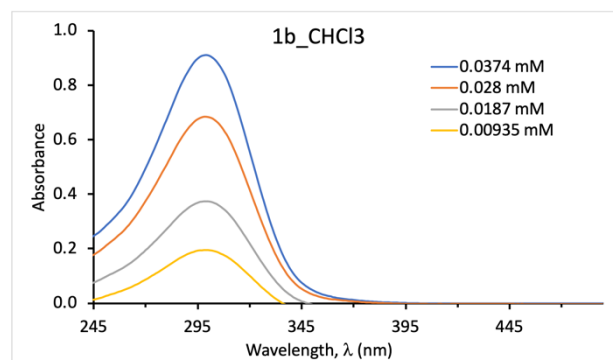

(c)

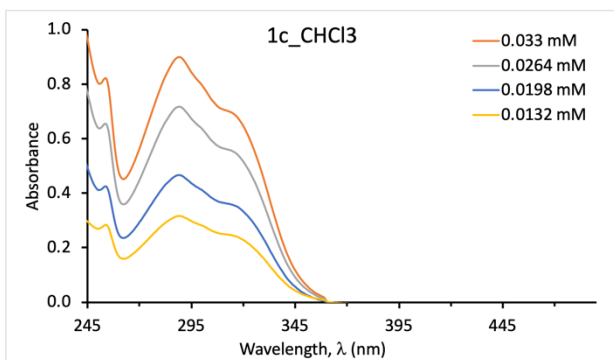

(d)

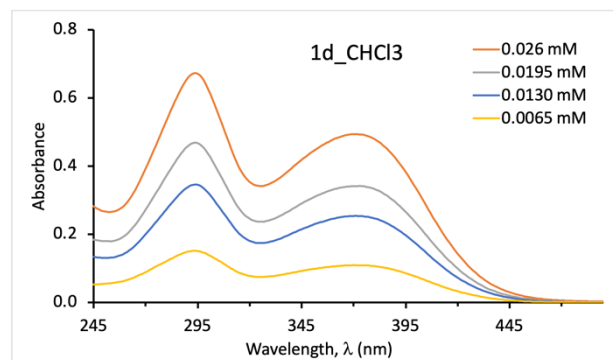

**Figure S3.** Absorption spectra of **1a – d** in chloroform (x-axis begins at solvent cut-off).

(a)

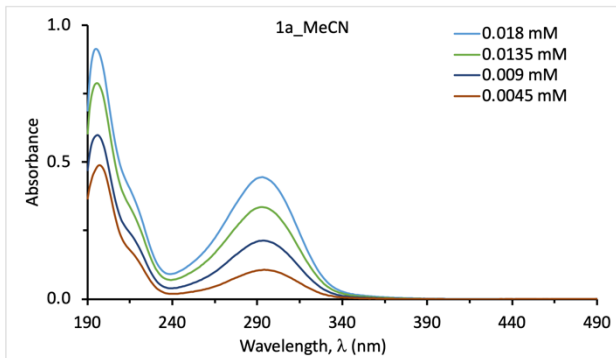

(b)

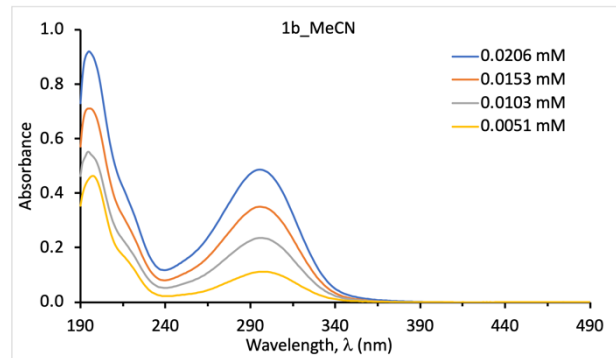

(c)

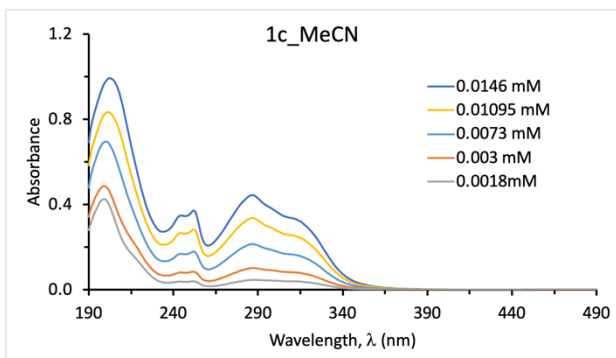

(d)

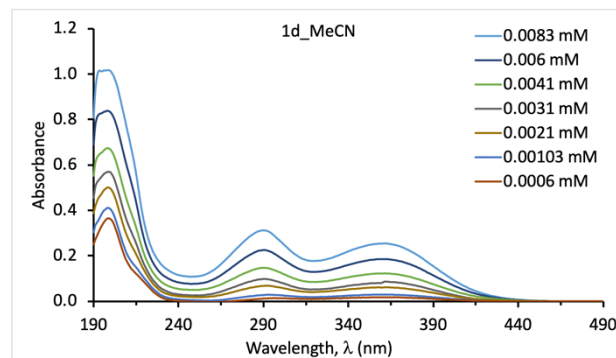

**Figure S4.** Absorption spectra of **1a – d** in acetonitrile.

(a)

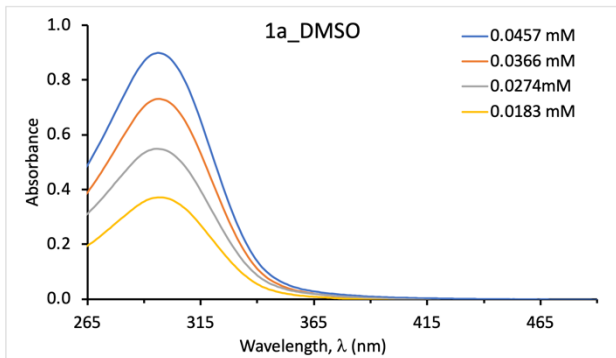

(b)

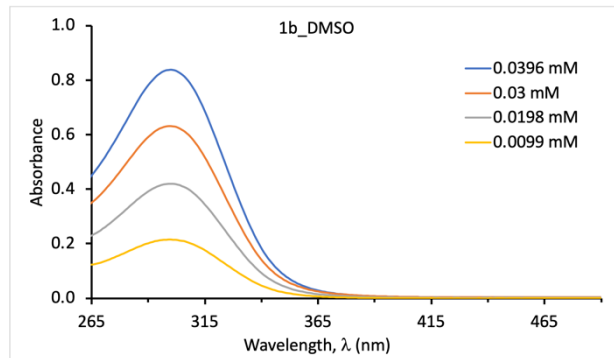

(c)

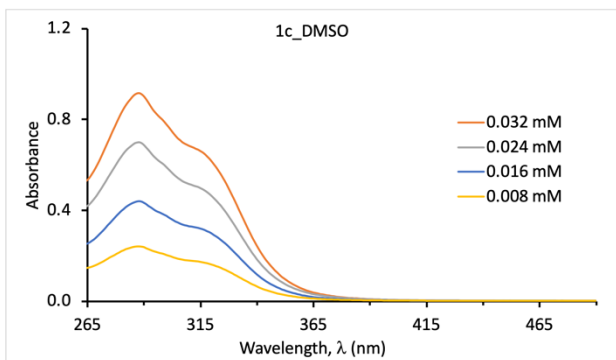

(d)

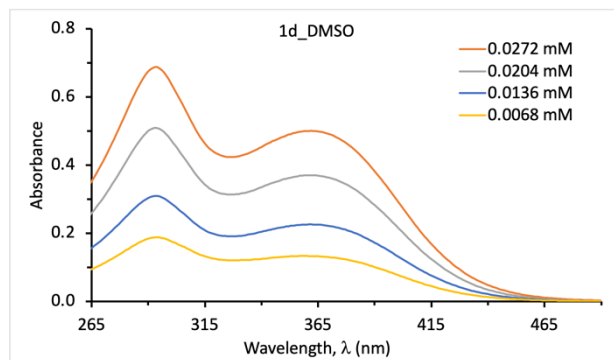

**Figure S5.** Absorption spectra of **1a – d** in DMSO (x-axis begins at solvent cut-off).

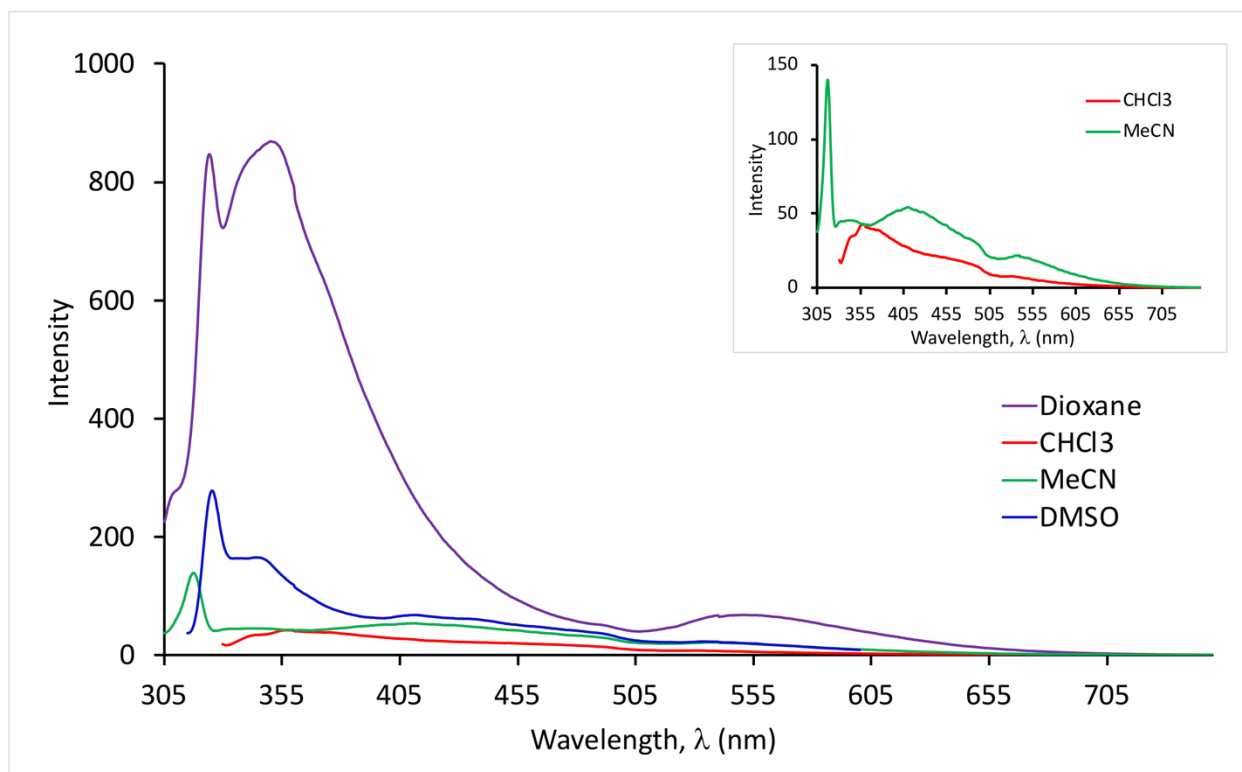

**Figure S6.** Emission spectra of **1a** in different solvents. The absorbance of all solutions ranged between 0.1 – 0.15 at excitation wavelength. (Sharp signals observed in acetonitrile, dioxane and DMSO may be due to Raman scattering).

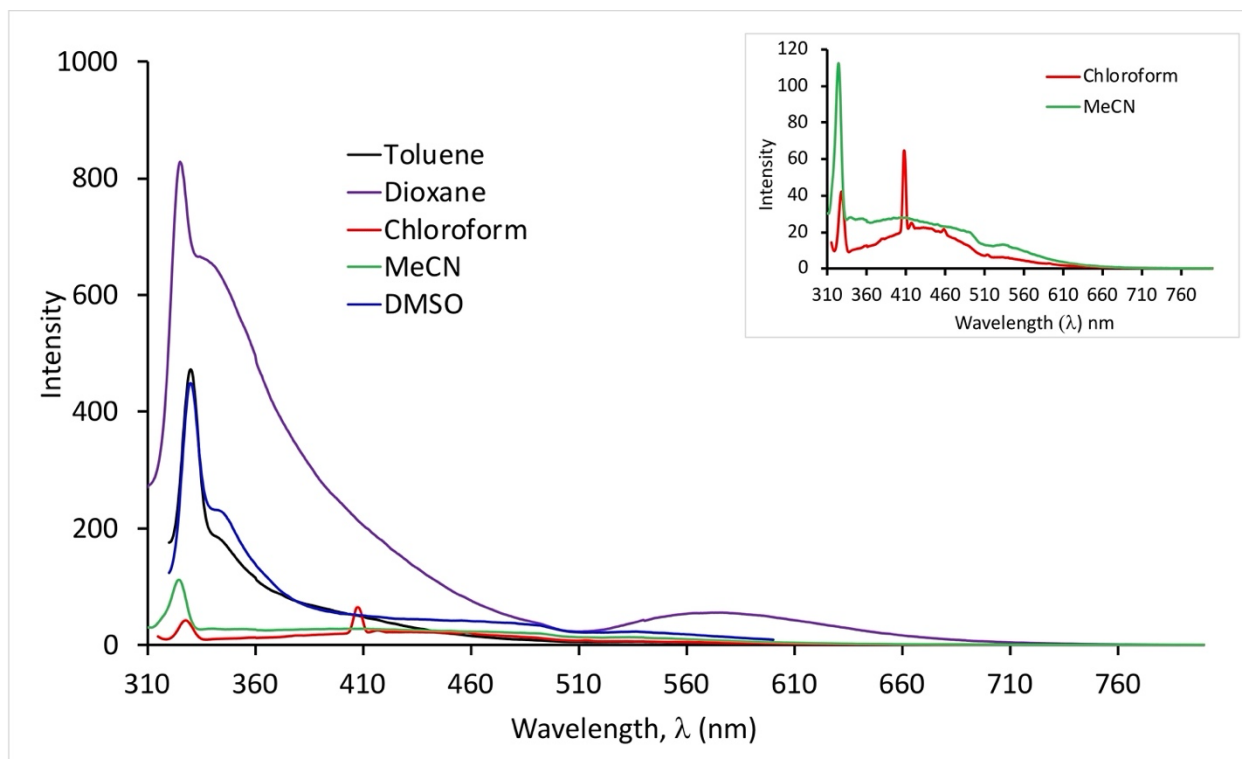

**Figure S7.** Emission spectra of **1b** in different solvents. The absorbance of all solutions ranged between 0.1 – 0.15 at excitation wavelength. (Sharp signals observed may be due to Raman scattering).



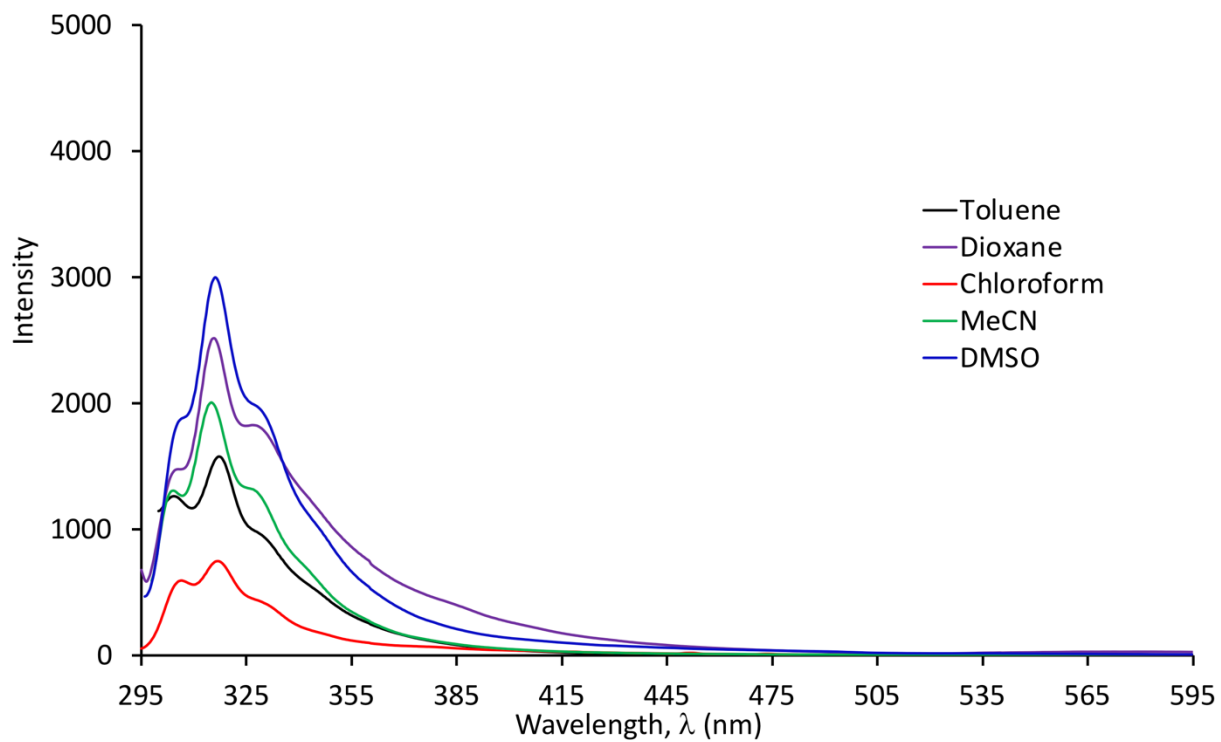

**Figure S8.** Emission spectra of **1c** in different solvents. The absorbance of all solutions ranged between 0.1 – 0.15 at excitation wavelength. The emission of **1c** was reproducible at different excitation wavelengths in all solvents.

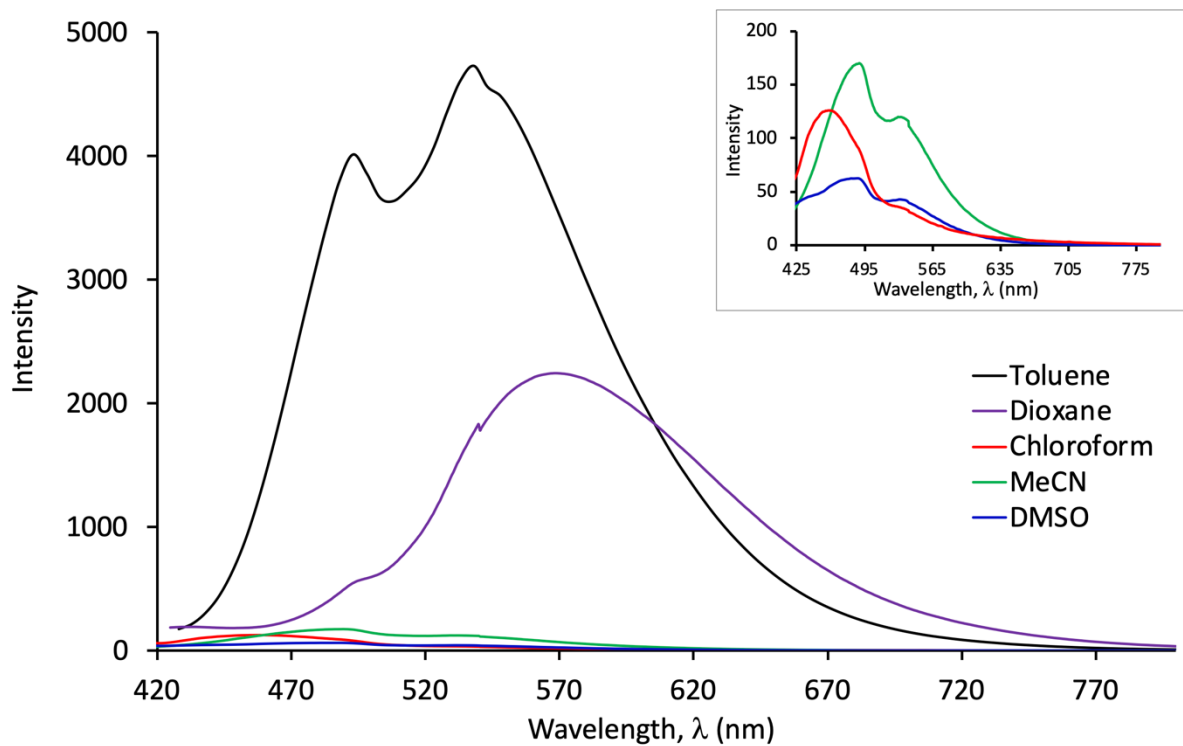

**Figure S9.** Emission spectra of **1d** in different solvents. The absorbance of all solutions ranged between 0.1 – 0.15 at excitation wavelength.

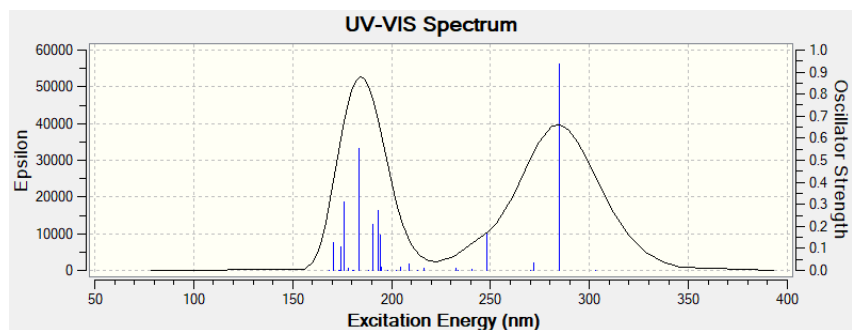

**Figure S10.** TDDFT (CAM-B3LYP/6-311++G\*\*) simulated UV absorption spectrum of **1a** in acetonitrile.

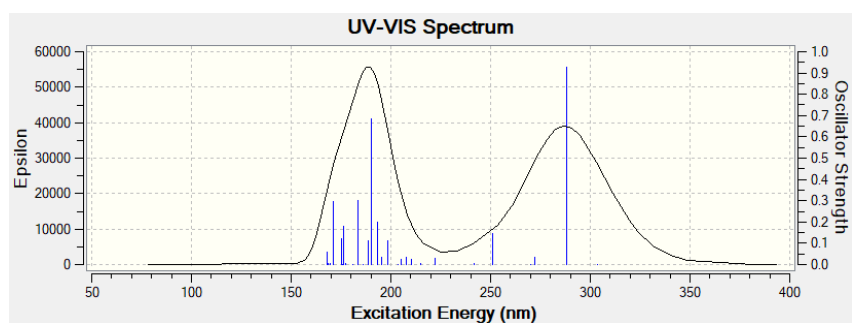

**Figure S11.** TDDFT (CAM-B3LYP/6-311++G\*\*) simulated UV absorption spectrum of **1b** in acetonitrile.

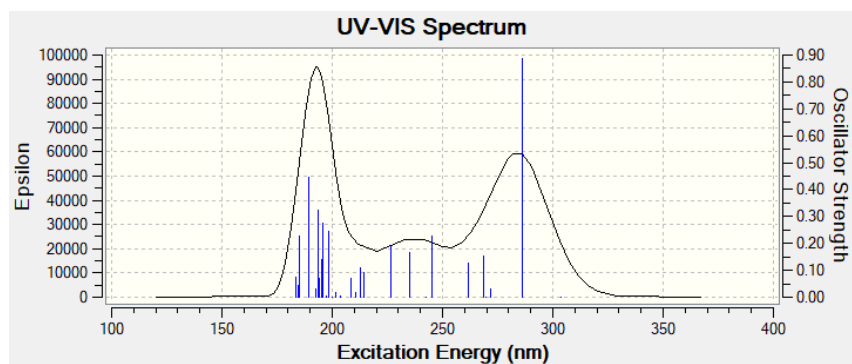

**Figure S12.** TDDFT (CAM-B3LYP/6-311++G\*\*) simulated UV absorption spectrum of **1c** in acetonitrile.

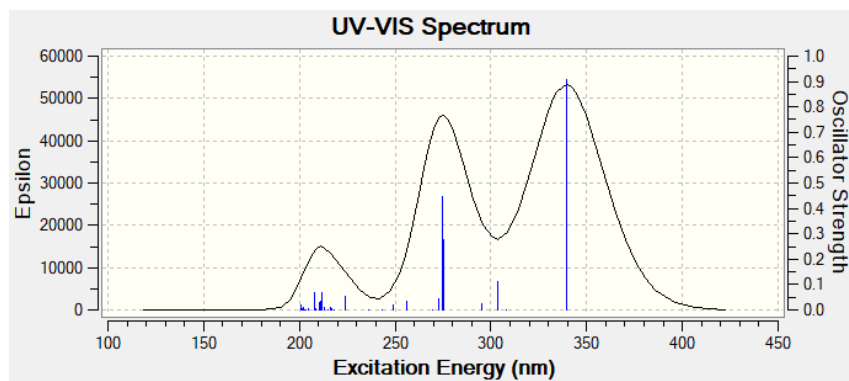

**Figure S13.** TDDFT (CAM-B3LYP/6-311++G\*\*) simulated UV absorption spectrum of **1d** in acetonitrile.

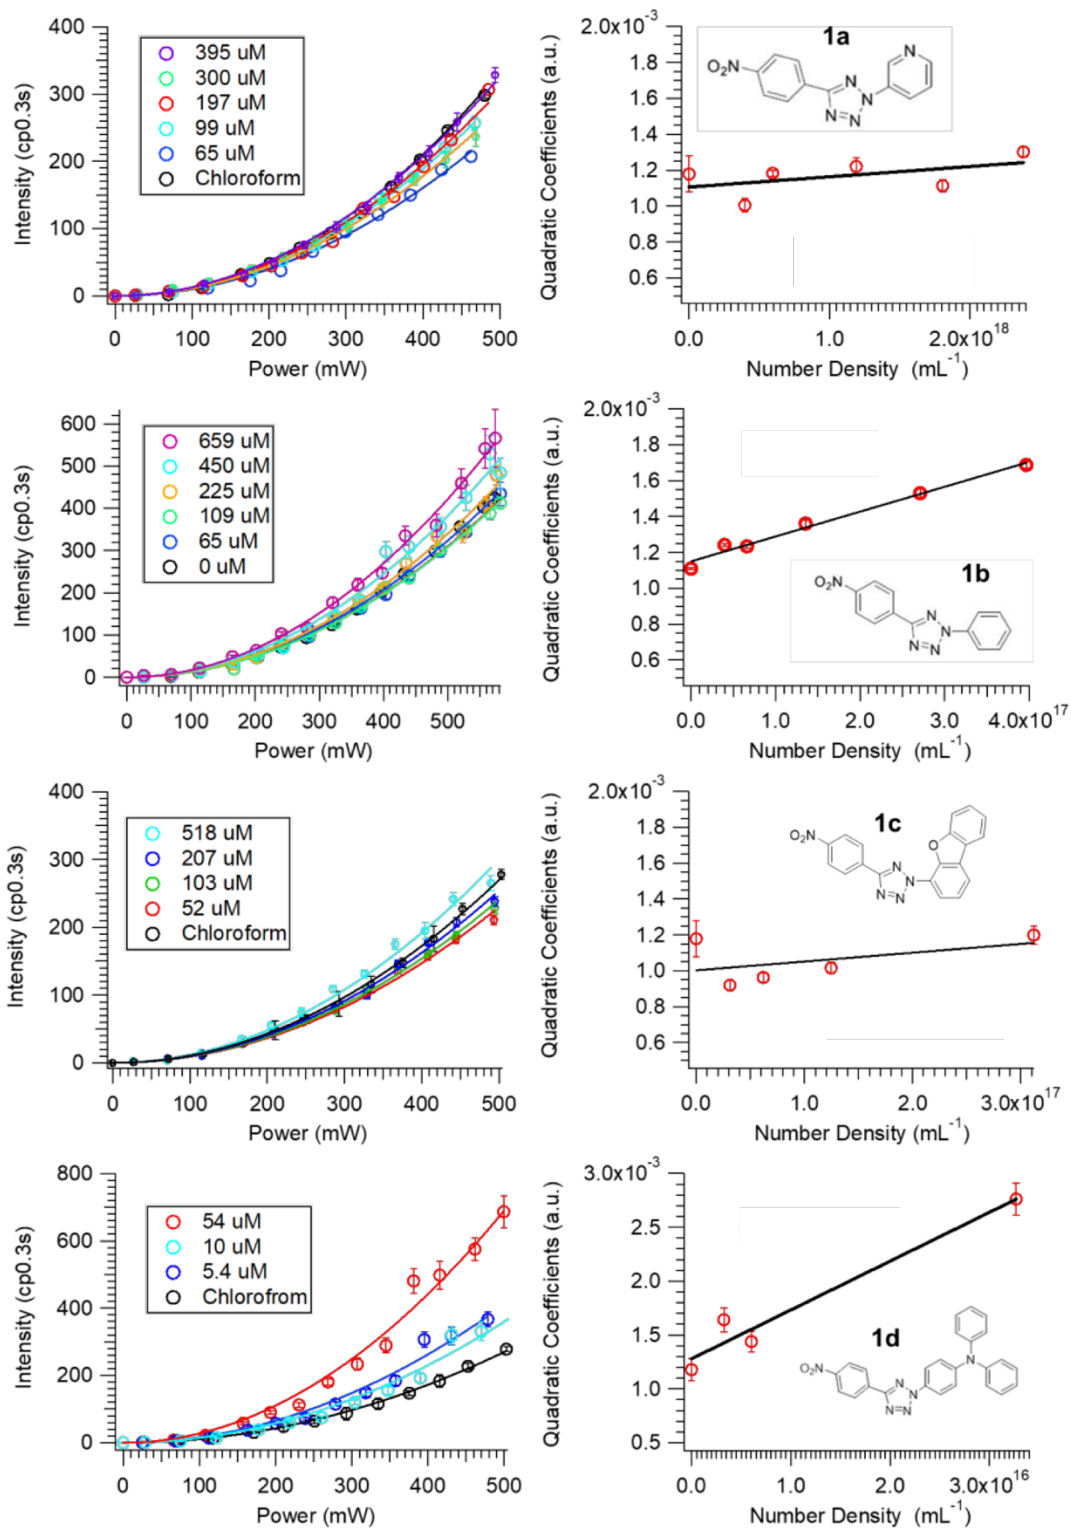

**Figure S14.** HRS data for compounds **1a** – **d**.

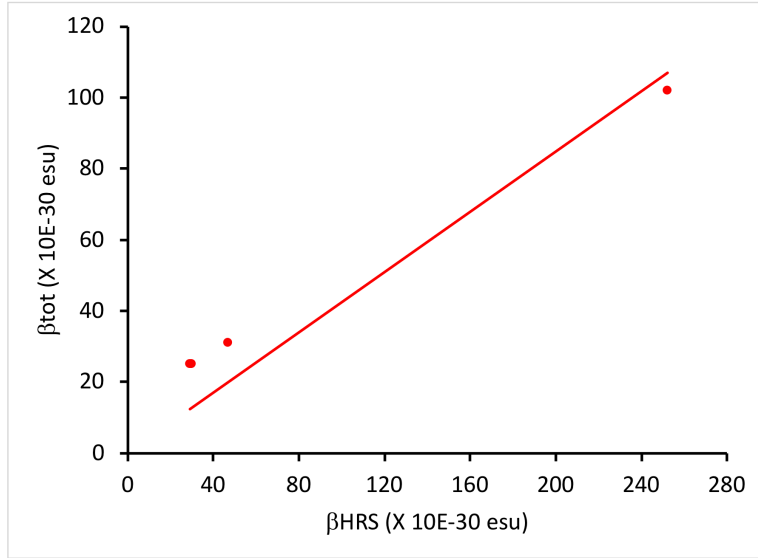

|               |             |            |             |              |
|---------------|-------------|------------|-------------|--------------|
| $\beta_{tot}$ | 25.4        | 31.3       | 25.2        | 101.6        |
| $\beta_{HRS}$ | $30 \pm 12$ | $47 \pm 2$ | $30 \pm 16$ | $252 \pm 16$ |

**Figure S15.** Plot of  $\beta_{tot}$  Vs  $\beta_{HRS}$  showing a good correlation.

**Table S1.** UV absorption bands for **1a – d**, and the corresponding molar absorptivities.

|           |                              | <b>Toluene</b> | <b>Dioxane</b> | <b>CHCl<sub>3</sub></b> | <b>MeCN</b>  | <b>DMSO</b> |
|-----------|------------------------------|----------------|----------------|-------------------------|--------------|-------------|
| <b>1a</b> | $\lambda_1^a (\epsilon_1)^b$ | Insoluble      | 296 (26719)    | 295 (24813)             | 293 (24593)  | 296 (19860) |
|           | $\lambda_2^a (\epsilon_2)^b$ |                | -              | -                       | 195 (56904)  | -           |
| <b>1b</b> | $\lambda_1^a (\epsilon_1)^b$ | 300 (21064)    | 295 (25138)    | 298 (23666)             | 295 (23216)  | 300 (21158) |
|           | $\lambda_2^a (\epsilon_2)^b$ | -              | -              | -                       | 195 (47751)  | -           |
| <b>1c</b> | $\lambda_1^a (\epsilon_1)^b$ | 290 (28216)    | 288 (32865)    | 289 (26355)             | 287 (30363)  | 288 (28692) |
|           | $\lambda_2^a (\epsilon_2)^b$ | -              | 253 (26635)    | -                       | 252 (25380)  | -           |
|           | $\lambda_3^a (\epsilon_3)^b$ | -              | -              | -                       | 199 (74787)  | -           |
| <b>1d</b> | $\lambda_1^a (\epsilon_1)^b$ | 374 (19807)    | 368 (23217)    | 370 (18497)             | 360 (30186)  | 360 (18059) |
|           | $\lambda_2^a (\epsilon_2)^b$ | 293 (24966)    | 291 (29544)    | 294 (25308)             | 290 (36625)  | 293 (24877) |
|           | $\lambda_3^a (\epsilon_3)^b$ |                |                |                         | 198 (153196) |             |

<sup>a</sup> in nm; <sup>b</sup> M<sup>-1</sup> cm<sup>-1</sup>

**Table S2.** TDDFT (CAM-B3LYP/6-311++G\*\*) vertical excitation energies ( $E(\lambda)$  / eV (nm)), oscillator strengths ( $f$ ), MO character and transition type for **1a – d** as well as the transition dipole moment in acetonitrile.

|              |             | State      | $E(\lambda)$ | $f$           | MO Character (%)             | Type                       | $\mu_{eg}$ |
|--------------|-------------|------------|--------------|---------------|------------------------------|----------------------------|------------|
| Acetonitrile |             |            |              |               |                              |                            |            |
| <b>1a</b>    | $\lambda_1$ | 2          | 4.35 (285)   | 0.940         | H→L (75%)                    | $\pi \rightarrow \pi^*/CT$ | 7.540      |
|              | $\lambda_2$ | 17         | 6.42 (193)   | 0.270         | H-7→L (50%)                  | $\pi \rightarrow \pi^*/CT$ |            |
|              |             | 21         | 6.76 (183)   | 0.552         | H-1→L+3 (44%)                |                            |            |
|              |             | 25         | 7.03 (176)   | 0.312         | H-1→L+4 (51%)                |                            |            |
| <b>1b</b>    | $\lambda_1$ | 2          | 4.30 (288)   | 0.929         | H→L (67%)                    | $\pi \rightarrow \pi^*/CT$ | 7.542      |
|              | $\lambda_2$ | 17         | 6.51 (191)   | 0.682         | H-3→L+1 (31%); H-2→L+1 (16%) | $\pi \rightarrow \pi^*/CT$ |            |
|              |             | 20         | 6.76 (183)   | 0.301         | H-3→L+2 (39%)                |                            |            |
|              |             | 27         | 7.24 (171)   | 0.294         | H→L+10 (46%)                 |                            |            |
| <b>1c</b>    | $\lambda_1$ | 2          | 4.33 (286)   | 0.887         | H-2→L (45%); H-1→L (22%)     | $\pi \rightarrow \pi^*/CT$ | 7.340      |
|              | $\lambda_2$ | 7          | 5.06 (245)   | 0.228         | H→L (31%); H→L+2 (20%)       | $\pi \rightarrow \pi^*/CT$ |            |
|              |             | 9          | 5.27 (235)   | 0.164         | H-2→L+1 (17%); H-1→L (38%)   |                            |            |
|              |             | 10         | 5.47 (227)   | 0.186         | H→L+2 (31%)                  |                            |            |
|              | $\lambda_3$ | 18         | 6.24 (198)   | 0.247         | H-1→L+8 (24%)                | $\pi \rightarrow \pi^*/CT$ |            |
|              |             | 20         | 6.34 (195)   | 0.277         | H-1→L+8 (23%)                |                            |            |
|              |             | 23         | 6.39 (194)   | 0.325         | H-8→L (61%)                  |                            |            |
|              | 26          | 6.55 (189) | 0.444        | H-4→L+1 (26%) |                              |                            |            |
| <b>1d</b>    | $\lambda_1$ | 1          | 3.65 (340)   | 0.909         | H→L (49%); H→L+1(37%)        | $\pi \rightarrow \pi^*/CT$ | 8.098      |
|              | $\lambda_2$ | 5          | 4.50 (275)   | 0.275         | H→L+5 (70%)                  | $\pi \rightarrow \pi^*/CT$ |            |
|              |             | 6          | 4.52 (274)   | 0.445         | H-6→L (31%); H-1→L (27%)     |                            |            |
|              | $\lambda_3$ | 13         | 5.53 (224)   | 0.054         | H-5→L+1 (22%)                | $\pi \rightarrow \pi^*/CT$ |            |
|              |             | 20         | 5.85 (212)   | 0.066         | H-1→L (33%)                  |                            |            |
|              | 24          | 5.97 (208) | 0.066        | H-3→L (29%)   |                              |                            |            |

<sup>a</sup> experimentally not observed.



**Cartesian coordinates, total energies, and number of imaginary frequencies for 1a – d.**

**1a**

Total Energy = -940.7143943 Hartrees

Number of Imaginary frequencies = 0

Cartesian coordinates of **1a** optimized at CAM-B3LYP/6-311++G\*\*

0,1  
C,-3.985422259,0.1982476799,0.0000741234  
C,-3.5771654066,-1.1241143935,-0.0000420798  
C,-3.0863961289,1.2513107802,0.0001287375  
C,-2.2210621289,-1.3994527207,-0.0001024689  
H,-4.3157456886,-1.9129373744,-0.0000829151  
C,-1.7332161859,0.9661266026,0.0000664363  
H,-3.4528018827,2.267894675,0.000219801  
C,-1.2946671958,-0.3575911413,-0.000050844  
H,-1.8699290146,-2.4227414383,-0.0001925053  
H,-1.0088975261,1.7698096624,0.0001088122  
N,2.1882444925,-0.507575108,-0.0000996932  
N,1.1001826254,0.2428981434,0.0000234383  
N,0.6409157302,-1.9206262308,-0.0002762768  
C,0.1377512211,-0.6631608862,-0.0001189377  
N,1.9287457823,-1.8039963776,-0.0003456951  
C,3.508584469,0.0212438084,-0.000019743  
C,4.6016366445,-0.8382574038,0.0005777798  
C,3.7055445538,1.3917759075,-0.0005316162  
H,4.4550765266,-1.9112976032,0.0010023975  
H,2.8593608042,2.0648427231,-0.0009826645  
C,6.0461868308,0.9264149286,0.0001483973  
N,-5.4305107318,0.4975051464,0.000138912  
O,-5.7628241263,1.6664378449,0.0002118445  
O,-6.1998219195,-0.4427186256,-0.0000164974  
H,7.0797639831,1.2558081006,0.0002186905  
C,5.0109124369,1.8506912678,-0.0004343952  
H,5.2236841265,2.9117301414,-0.00081723  
N,5.8492789679,-0.3891531084,0.0006461918

**1b**

Total Energy = -924.6756471 Hartrees

Number of Imaginary frequencies = 0

Cartesian coordinates of **1b** optimized at CAM-B3LYP/6-311++G\*\*

0,1

C,-3.9877874905,0.2026867934,-0.0000670121  
C,-3.5835728436,-1.1212959905,0.0001162791  
C,-3.0839056261,1.2519178505,-0.0002270216  
C,-2.2286692266,-1.4016421007,0.0001385711  
H,-4.3248219852,-1.9075869091,0.0002375635  
C,-1.7318675985,0.9616035965,-0.0002030851  
H,-3.4458868583,2.2700798594,-0.0003687642  
C,-1.2978299089,-0.3636453936,-0.0000190534  
H,-1.8812447872,-2.4262015352,0.000278448  
H,-1.0042034577,1.7622543864,-0.0003265846  
N,2.1848271455,-0.5197384768,0.0000570907  
N,1.0978722278,0.2304472845,0.0000391575  
N,0.6339036445,-1.9313578859,0.0000347162  
C,0.1336232719,-0.6738783905,0.0000091074  
N,1.9228538658,-1.8152351676,0.0000354039  
C,3.5118353292,0.0062614483,0.0000848692  
C,4.5885928705,-0.8695986004,0.0003866114  
C,3.693076346,1.3810859708,-0.0001929036  
H,4.4163149777,-1.9365834792,0.0006010162  
H,2.8336862118,2.0363873538,-0.0004208169  
C,6.0751454881,1.0265410028,0.0001261178  
C,5.8722569386,-0.3473110561,0.0004014663  
H,6.7190132556,-1.0222876341,0.0006351789  
N,-5.430429226,0.5070217608,-0.0000898184  
O,-5.7593319045,1.6773007162,-0.0002567672  
O,-6.2041510469,-0.4301389484,0.0000237925  
H,7.0814633952,1.4265228628,0.0001425077  
C,4.9847869625,1.8853196544,-0.0001682213  
H,5.1361390292,2.9575590274,-0.0003838488

**1c**

Total Energy = -1229.672058 Hartrees

Number of Imaginary frequencies = 0

Cartesian coordinates of **1c** optimized at CAM-B3LYP/6-311++G\*\*

0,1  
C,4.0317794076,2.7979681336,-0.7207747195  
C,2.6633949172,2.8380738112,-0.462871325  
C,1.9793451816,1.686327787,-0.1049261145  
C,2.6917909209,0.5011202576,-0.0100484519  
C,4.0638511131,0.4518695768,-0.2754464985  
C,4.7418968545,1.610895595,-0.6344561931  
H,4.5400920684,3.7123552522,-0.997822777  
H,2.1145530152,3.7674597713,-0.5331163684  
H,5.8051177601,1.589620969,-0.8388338323  
C,3.2620182391,-1.5782518954,0.3266116891  
C,3.1962533581,-2.9227665689,0.6334678556  
C,4.3827007078,-3.6354489543,0.5459938852  
C,5.5781550593,-3.0167951684,0.1663488558  
C,5.6188044253,-1.6659551397,-0.1361669351  
C,4.4381021249,-0.9329624044,-0.0545466761  
H,2.2641594616,-3.3873798815,0.9260871551  
H,4.3824152409,-4.693529477,0.7770039741  
H,6.4848210894,-3.6059628943,0.1092750884  
H,6.5485294099,-1.1935293607,-0.4288544435  
O,2.1979980772,-0.7102414385,0.354724181  
N,0.0314750461,2.7611733802,0.8100579663  
N,-1.2349954543,2.5059400894,0.8658766095  
N,0.5887205742,1.7408850026,0.1744904557  
N,-0.2788109434,0.8148509272,-0.1929118431  
C,-1.4186055088,1.3115548631,0.2545292664  
C,-2.7209293376,0.6578696373,0.1057386389  
C,-2.815861072,-0.5809521204,-0.5276736468  
C,-3.8671949268,1.2778872842,0.6007699289  
C,-4.0452937197,-1.1978741122,-0.6691174112  
H,-1.9206391905,-1.0553701437,-0.9075622336  
C,-5.1016880722,0.6679856981,0.4646750924  
H,-3.781575909,2.2383776225,1.0912580376  
C,-5.1688117422,-0.560982097,-0.1689372668  
H,-4.1462281677,-2.1571141956,-1.156244687  
H,-6.0051892484,1.1272520563,0.8393999125  
N,-6.4816072092,-1.215165701,-0.3165173326  
O,-7.4530647091,-0.6381614427,0.1314535167  
O,-6.5144988417,-2.2932187191,-0.8775343531

**1d**

Total Energy = -1441.9602126 Hartrees

Number of Imaginary frequencies = 0

Cartesian coordinates of **1d** optimized at CAM-B3LYP/6-311++G\*\*

0,1  
C,3.9030424965,0.0801715566,-0.9362844563  
C,3.5598466514,-1.2601243905,-0.8855334847  
C,2.9768425118,1.0887466211,-0.729458382  
C,2.2453336463,-1.5990508751,-0.6191192361  
H,4.3163147655,-2.0133085203,-1.0533087647  
C,1.6654295345,0.7397546437,-0.463448198  
H,3.2905377625,2.1216345814,-0.7783266001  
C,1.2929046642,-0.6029895134,-0.406902094  
H,1.9456541703,-2.6375189203,-0.5725734039  
H,0.9215853525,1.5075032109,-0.2966192403  
N,-2.1082412361,-0.9089139967,0.2933740612  
N,-1.0769718866,-0.1124500557,0.0808002671  
N,-0.5299336675,-2.2516590531,-0.034232713  
C,-0.094774573,-0.9758748847,-0.1236586654  
N,-1.7988863347,-2.1911115371,0.2261169601  
C,-3.4263346952,-0.4409801469,0.5675465966  
C,-4.4102103602,-1.3415246401,0.9503026511  
C,-3.7126163166,0.9103401062,0.449600286  
H,-4.1720146958,-2.3914443593,1.0492606984  
C,-4.9930334621,1.3618351356,0.7103593467  
H,-2.9383308595,1.5993584759,0.1422741305  
C,-6.001518527,0.4758718896,1.1020845004  
H,-5.2166111587,2.414966819,0.6061426536  
C,-5.6853500614,-0.8820548553,1.2188472429  
H,-6.4477627707,-1.583753611,1.5289744639  
N,5.3022825732,0.446777626,-1.2195316736  
O,5.5788403638,1.6301097697,-1.2573336211  
O,6.0966950321,-0.4555717356,-1.3985959564  
N,-7.299358662,0.9373484676,1.3726618813  
C,-7.5073210275,2.2300142082,1.9262972234  
C,-8.4871705292,3.0676862395,1.3977057909  
C,-6.7479342238,2.6680863257,3.0098182645  
C,-8.7036470742,4.3220576883,1.9479216846  
H,-9.0805343624,2.7284592756,0.5577326088  
C,-6.95847803,3.9299131333,3.5444789685  
H,-5.9922980125,2.0159386637,3.4301047672  
C,-7.9384441753,4.7621728555,3.0195234522  
H,-9.4694540231,4.9631011886,1.5277200947

H,-6.3610683657,4.2581309825,4.3867329463  
H,-8.1055565356,5.7445139678,3.443631861  
C,-8.4288018832,0.1160756246,1.1054278385  
C,-8.5491499918,-0.5477324824,-0.1141259643  
C,-9.4349956519,-0.0217082714,2.0591629141  
C,-9.6532330469,-1.3475248068,-0.3666721448  
H,-7.7734884665,-0.4353885684,-0.8615709651  
C,-10.5446151811,-0.8099078554,1.793424786  
H,-9.3446014805,0.4951505813,3.0064892688  
C,-10.6576923985,-1.4804157433,0.5829897091  
H,-9.7342699566,-1.8590992898,-1.3183593606  
H,-11.3203714131,-0.9082333056,2.5434093115  
H,-11.5223038181,-2.1002550295,0.3803227944

AW090319\_CRUDE

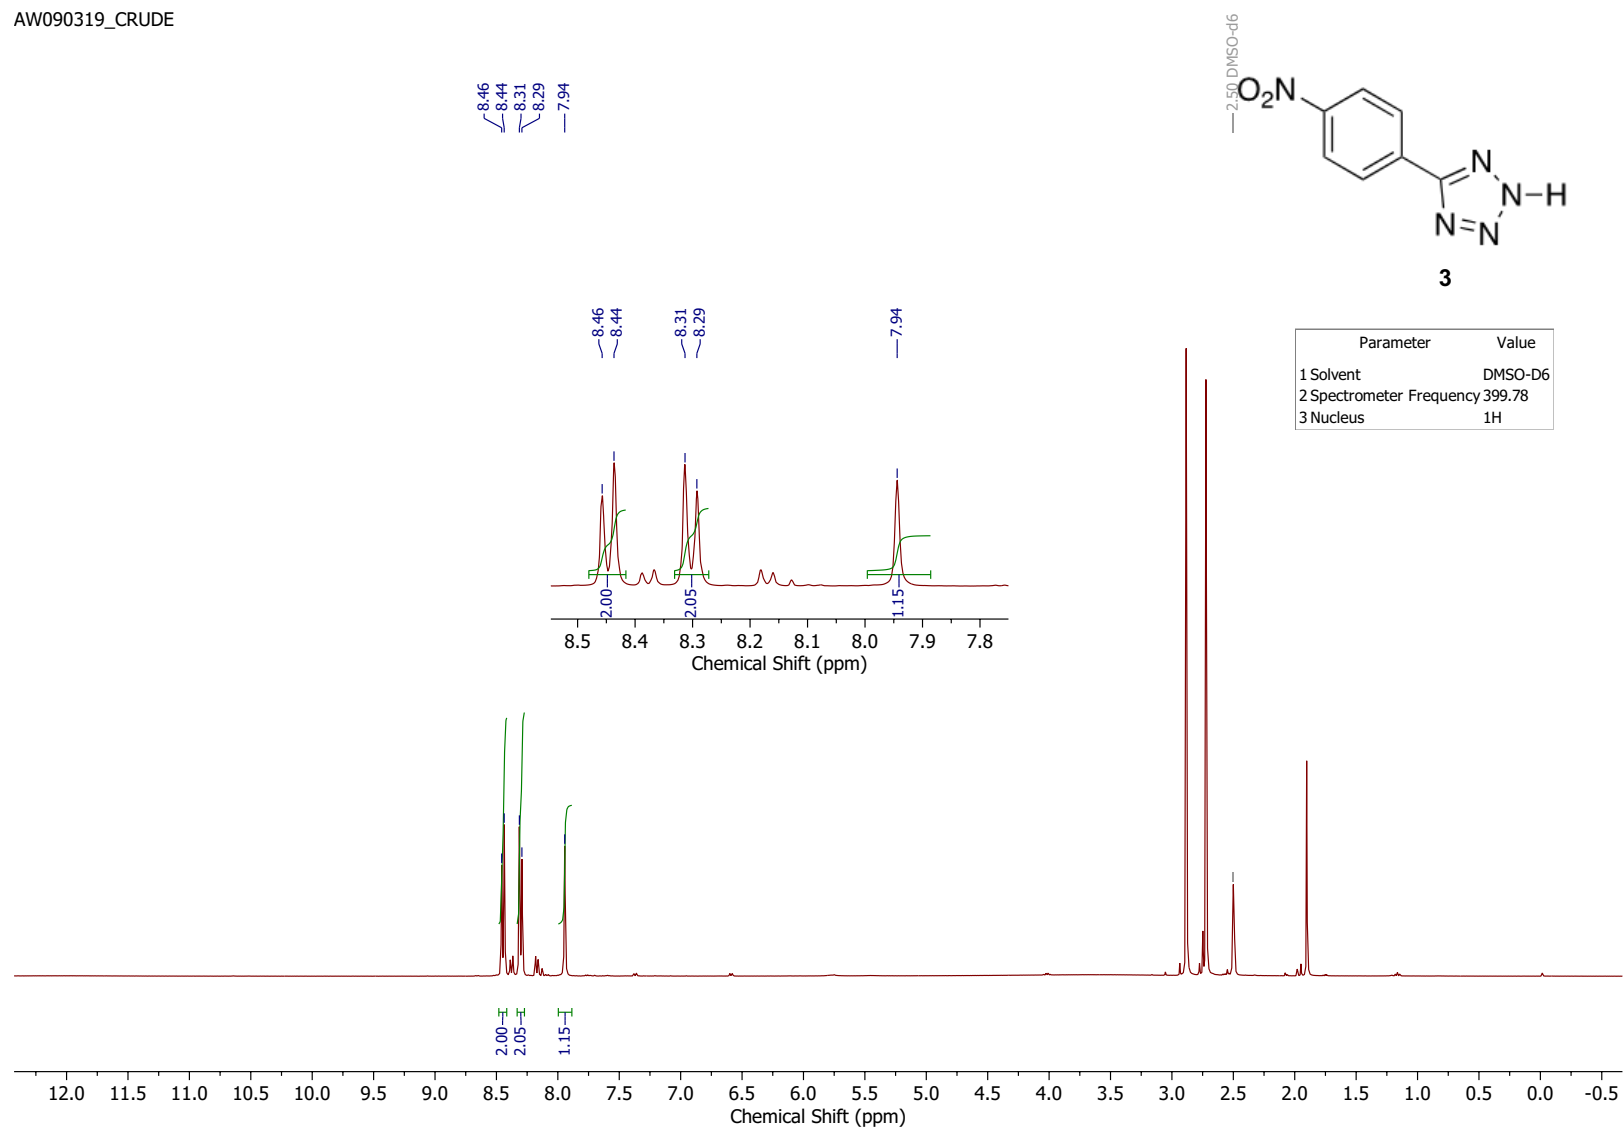

Figure S1.  $^1\text{H}$  NMR spectra of **3** in  $\text{DMSO-}d_6$

AW092519\_PRODUCT

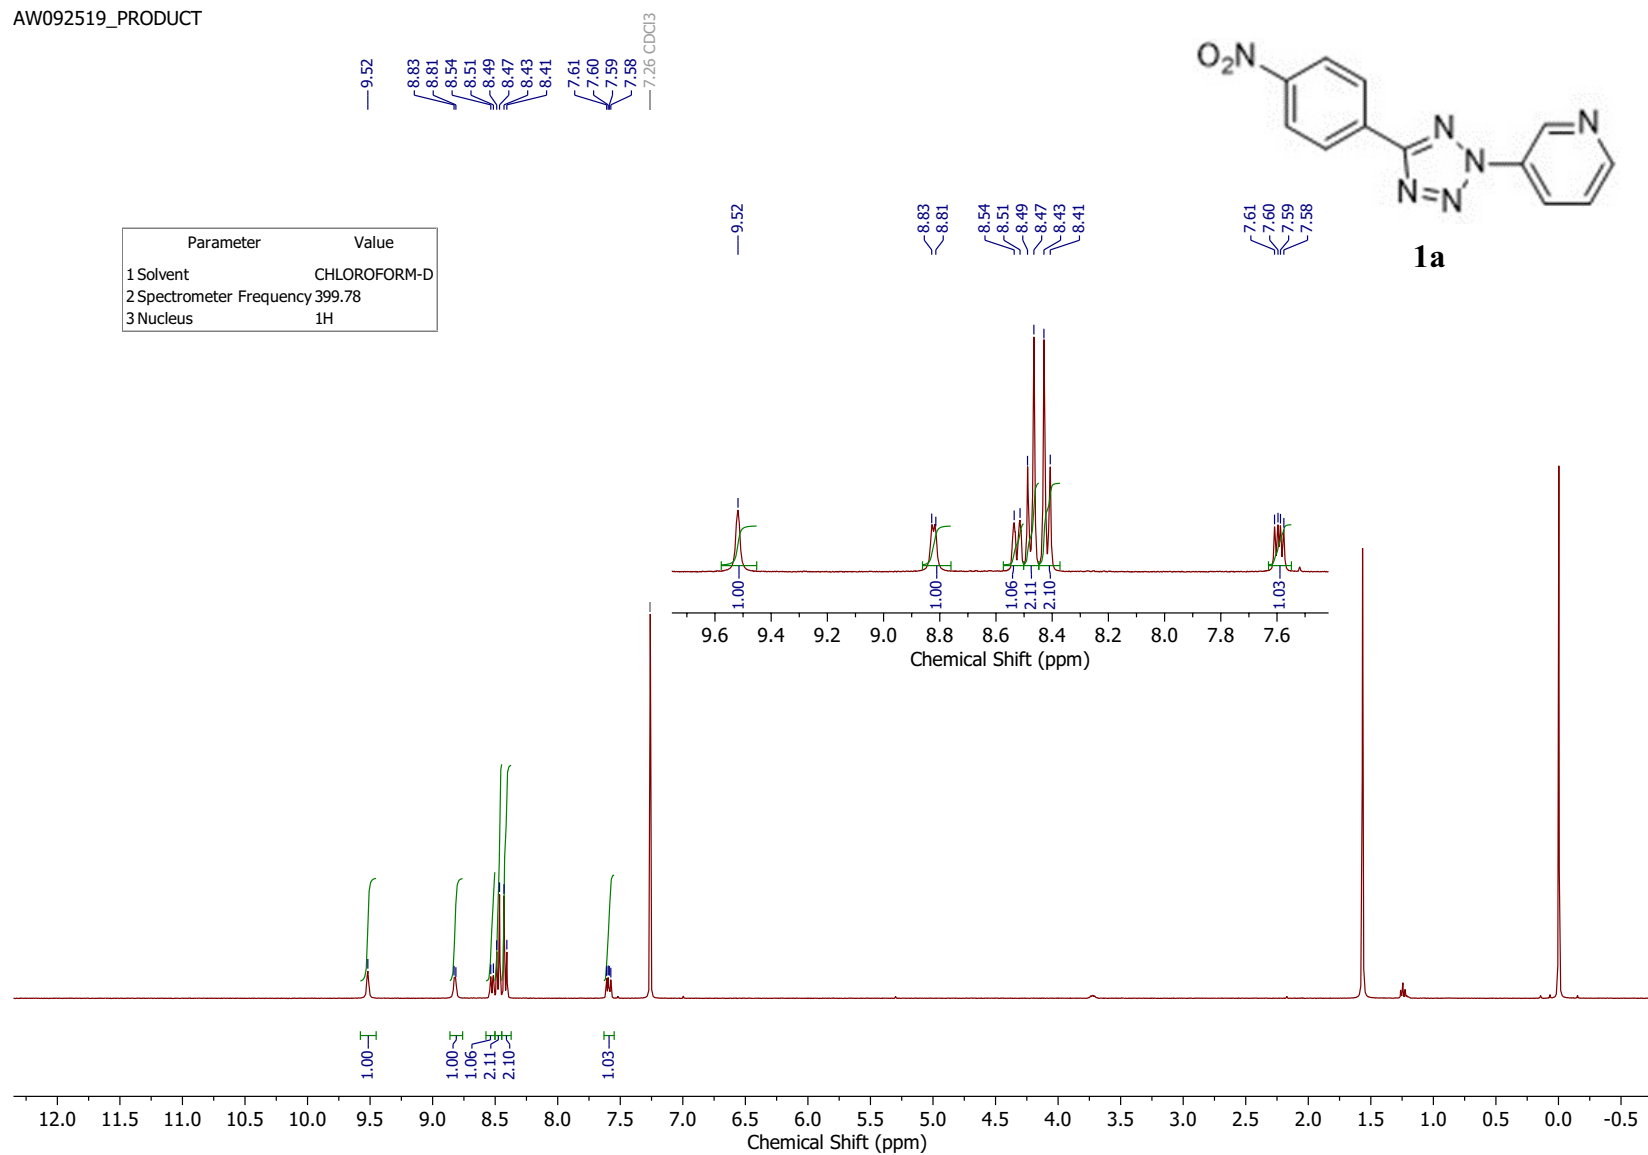

Figure S2. <sup>1</sup>H NMR spectra of **1a** in Chloroform-*d*

AW092519\_PRODUCT

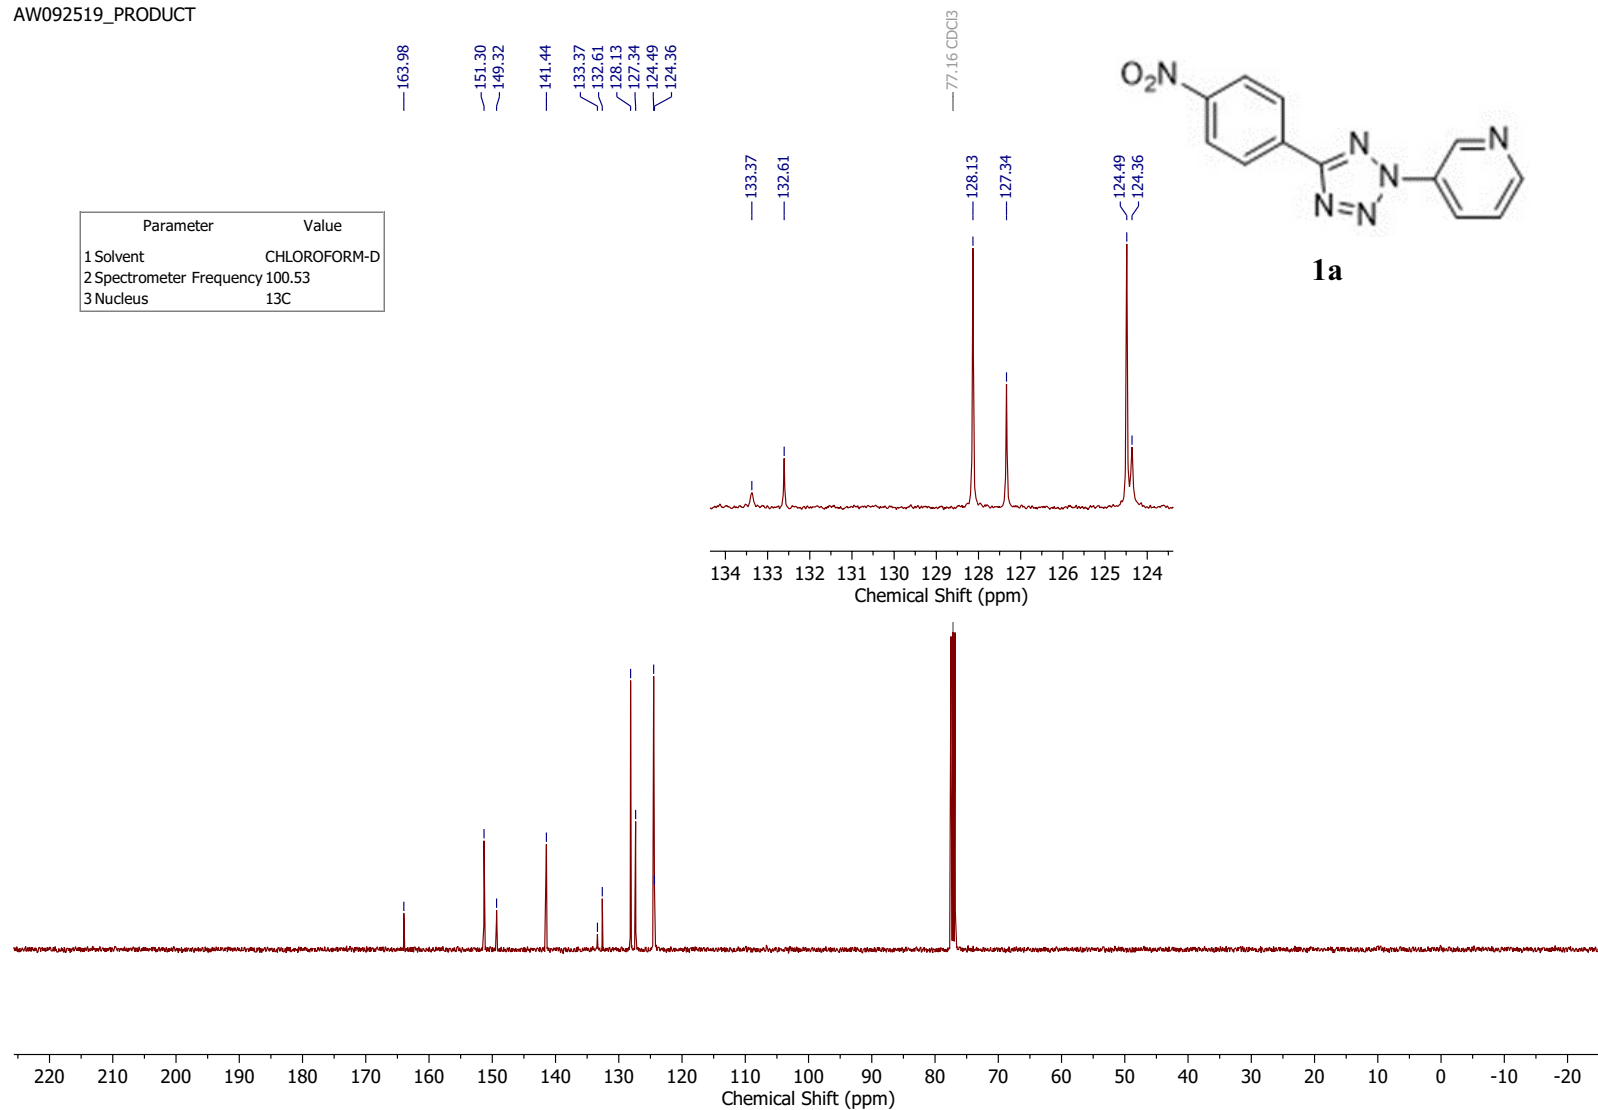

Figure S3. <sup>13</sup>C NMR spectra of **1a** in Chloroform-*d*



AW062920\_PROD\_NO2\_phenyl\_recrys

8.23  
8.21  
8.18  
8.16  
8.04  
8.02  
7.56  
7.55  
7.53  
7.51  
7.49

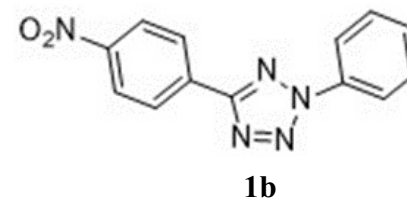

8.23  
8.21  
8.18  
8.16  
8.04  
8.02

7.56  
7.55  
7.53  
7.51  
7.49

| Parameter                | Value          |
|--------------------------|----------------|
| 1 Solvent                | CHLOROFORM-D   |
| 2 Spectrometer Frequency | 399.78         |
| 3 Nucleus                | <sup>1</sup> H |

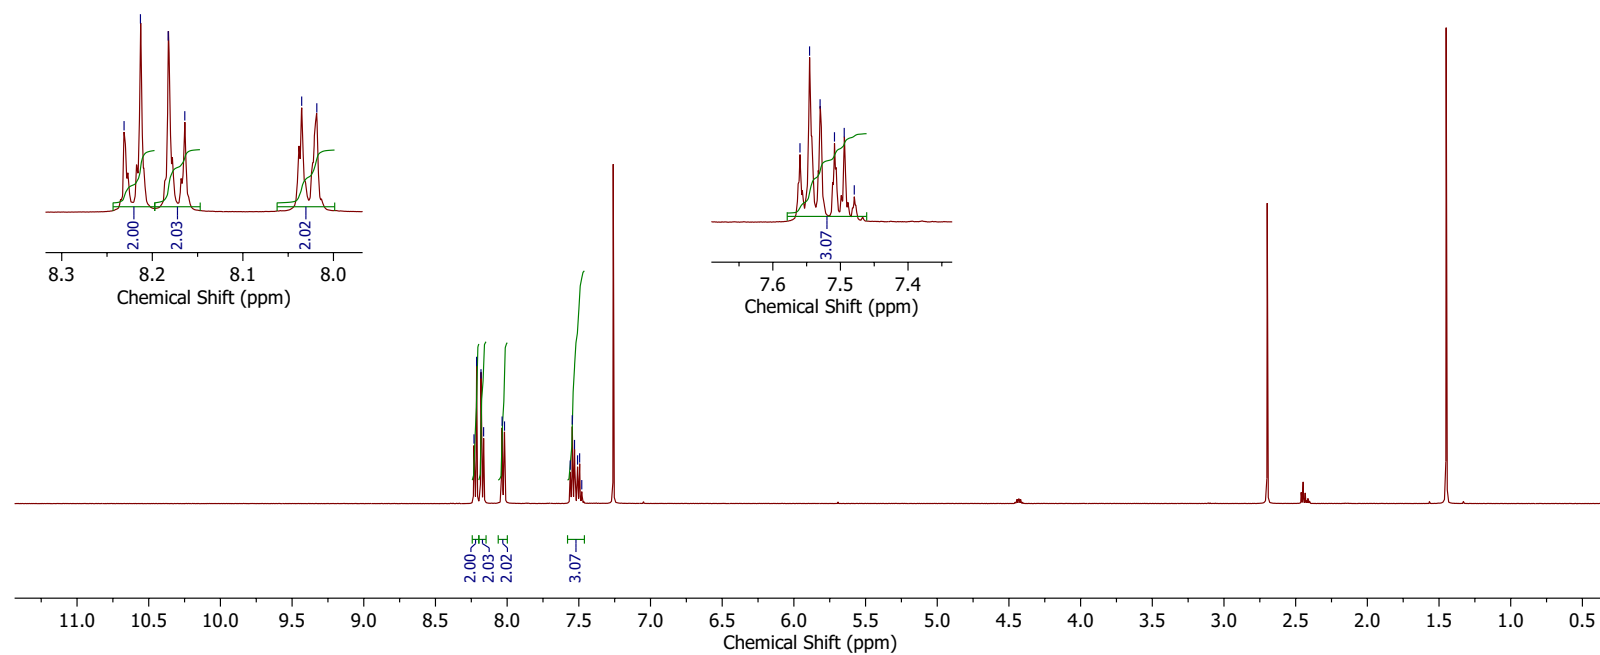

**Figure S4.** <sup>1</sup>H NMR spectra of **1b** in Chloroform-*d*

NO2\_Phenyl\_CDCL3

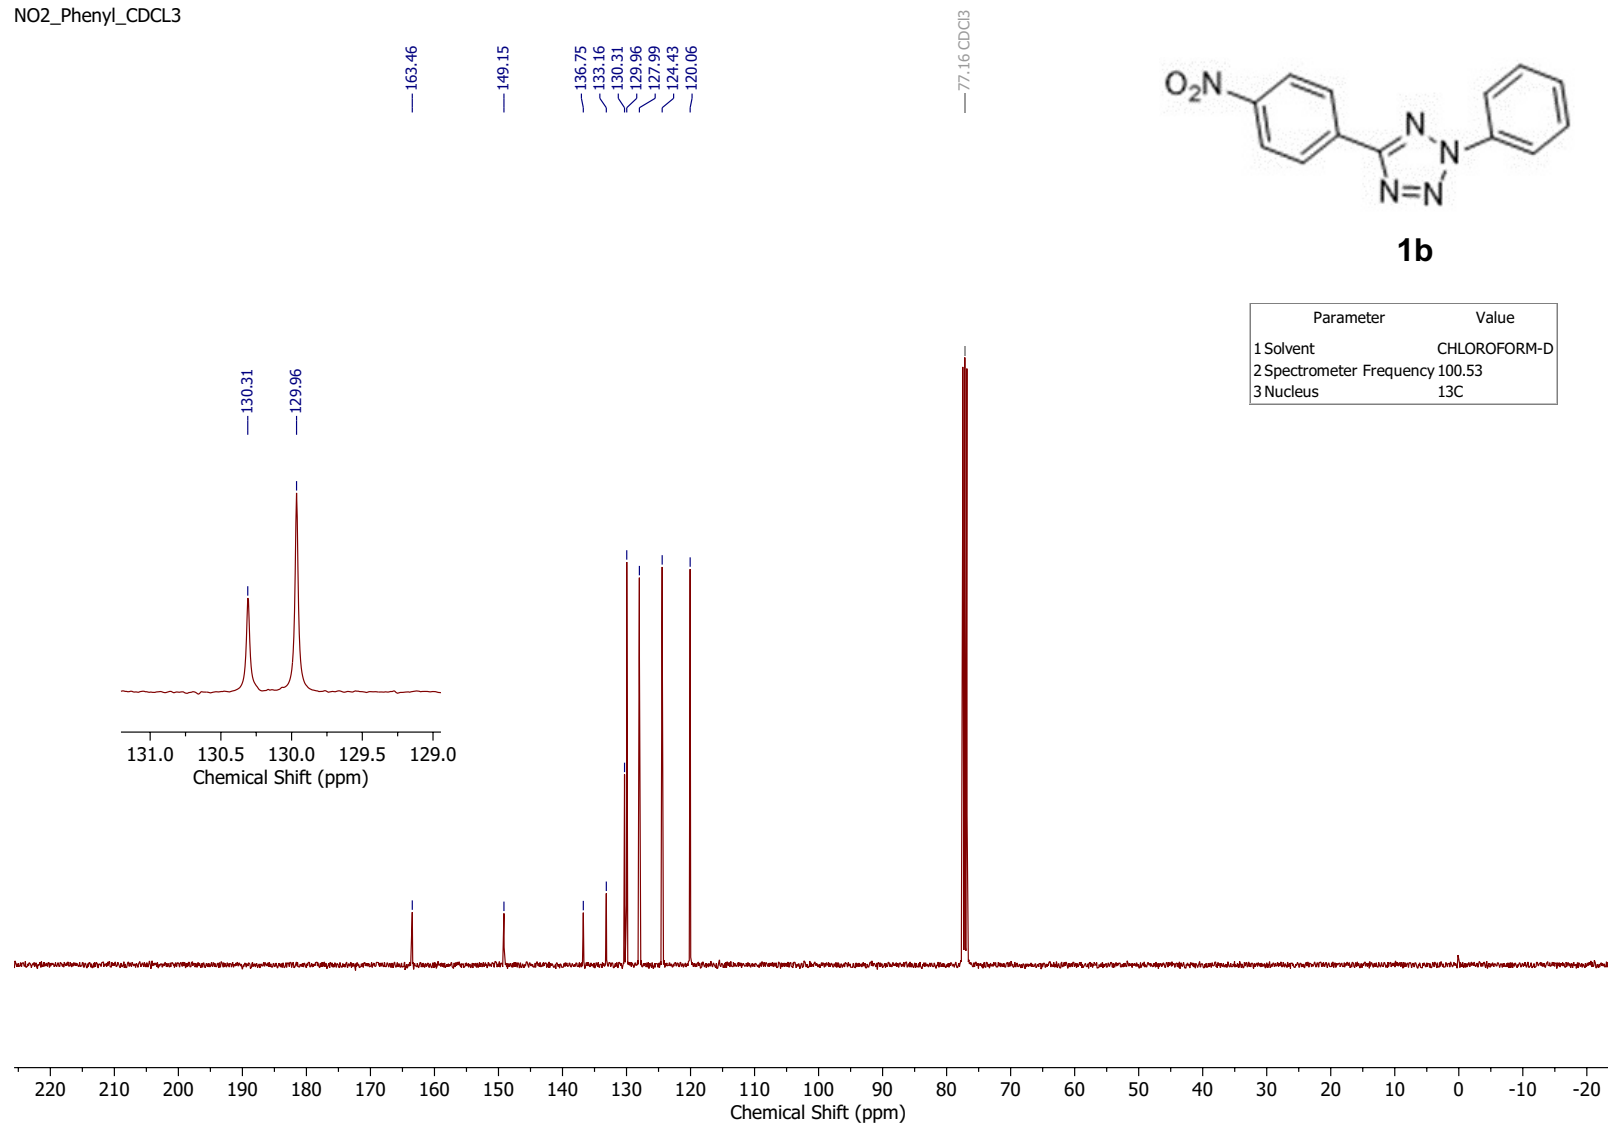

Figure S5. <sup>13</sup>C NMR spectra of **1b** in Chloroform-*d*

AW061120\_PROD\_NO2\_Dibenzofuran\_residue

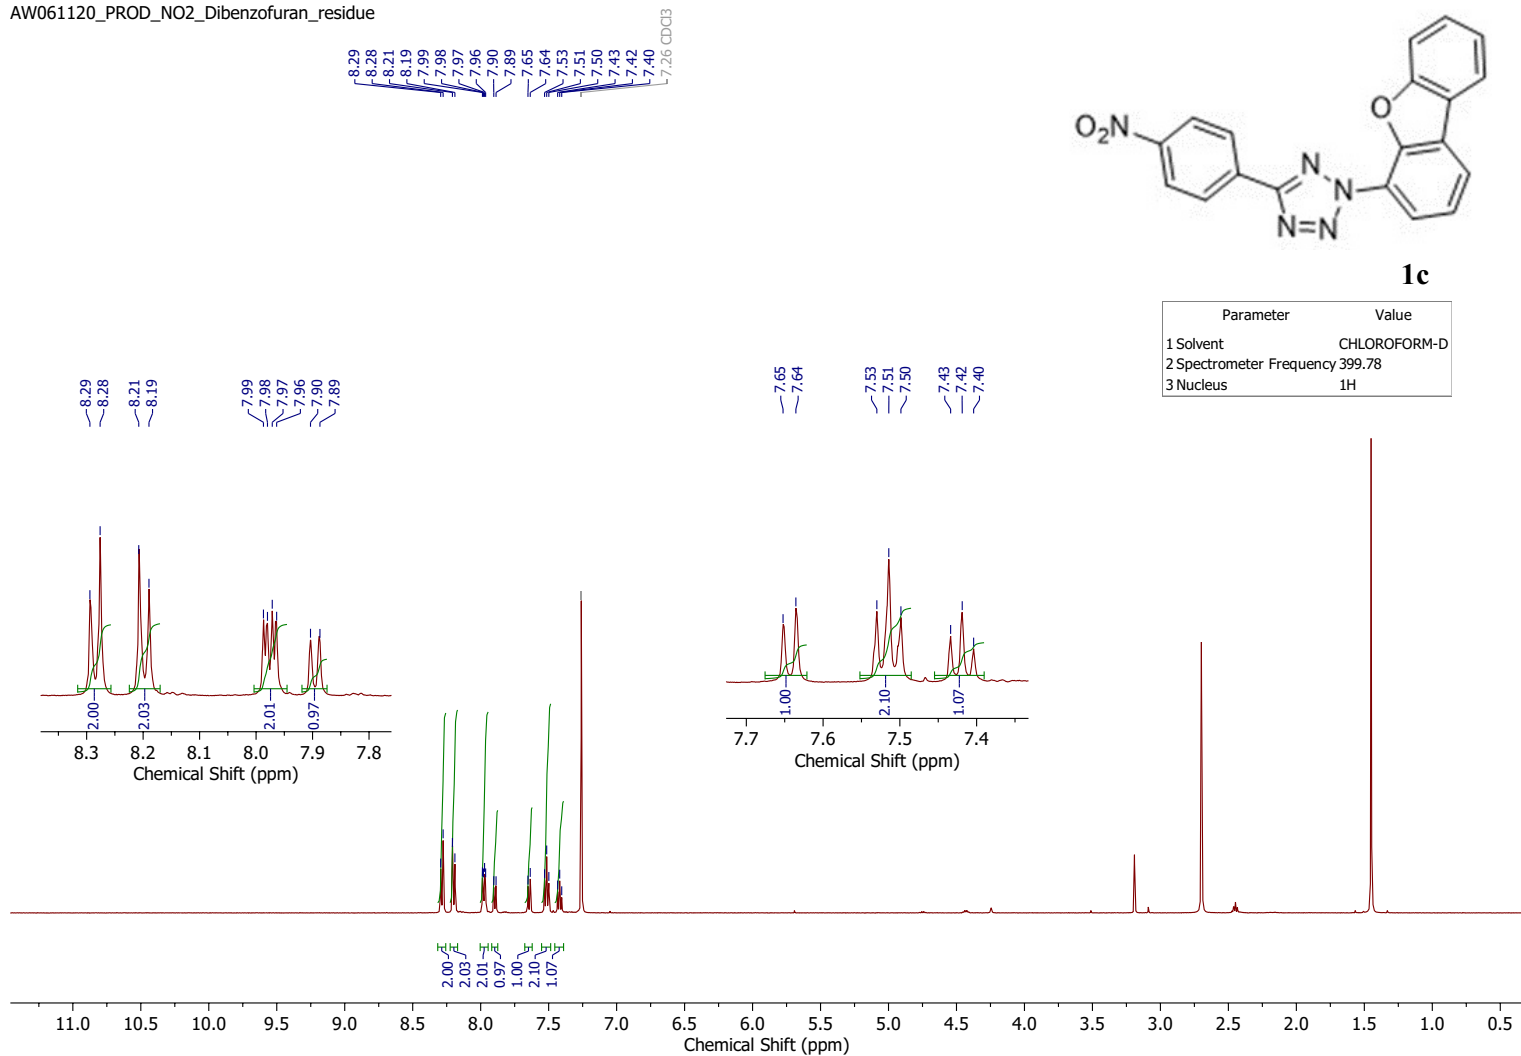

Figure S6. <sup>1</sup>H NMR spectra of **1c** in Chloroform-*d*

AW061120\_PROD\_NO2\_dibenzofuran\_residue

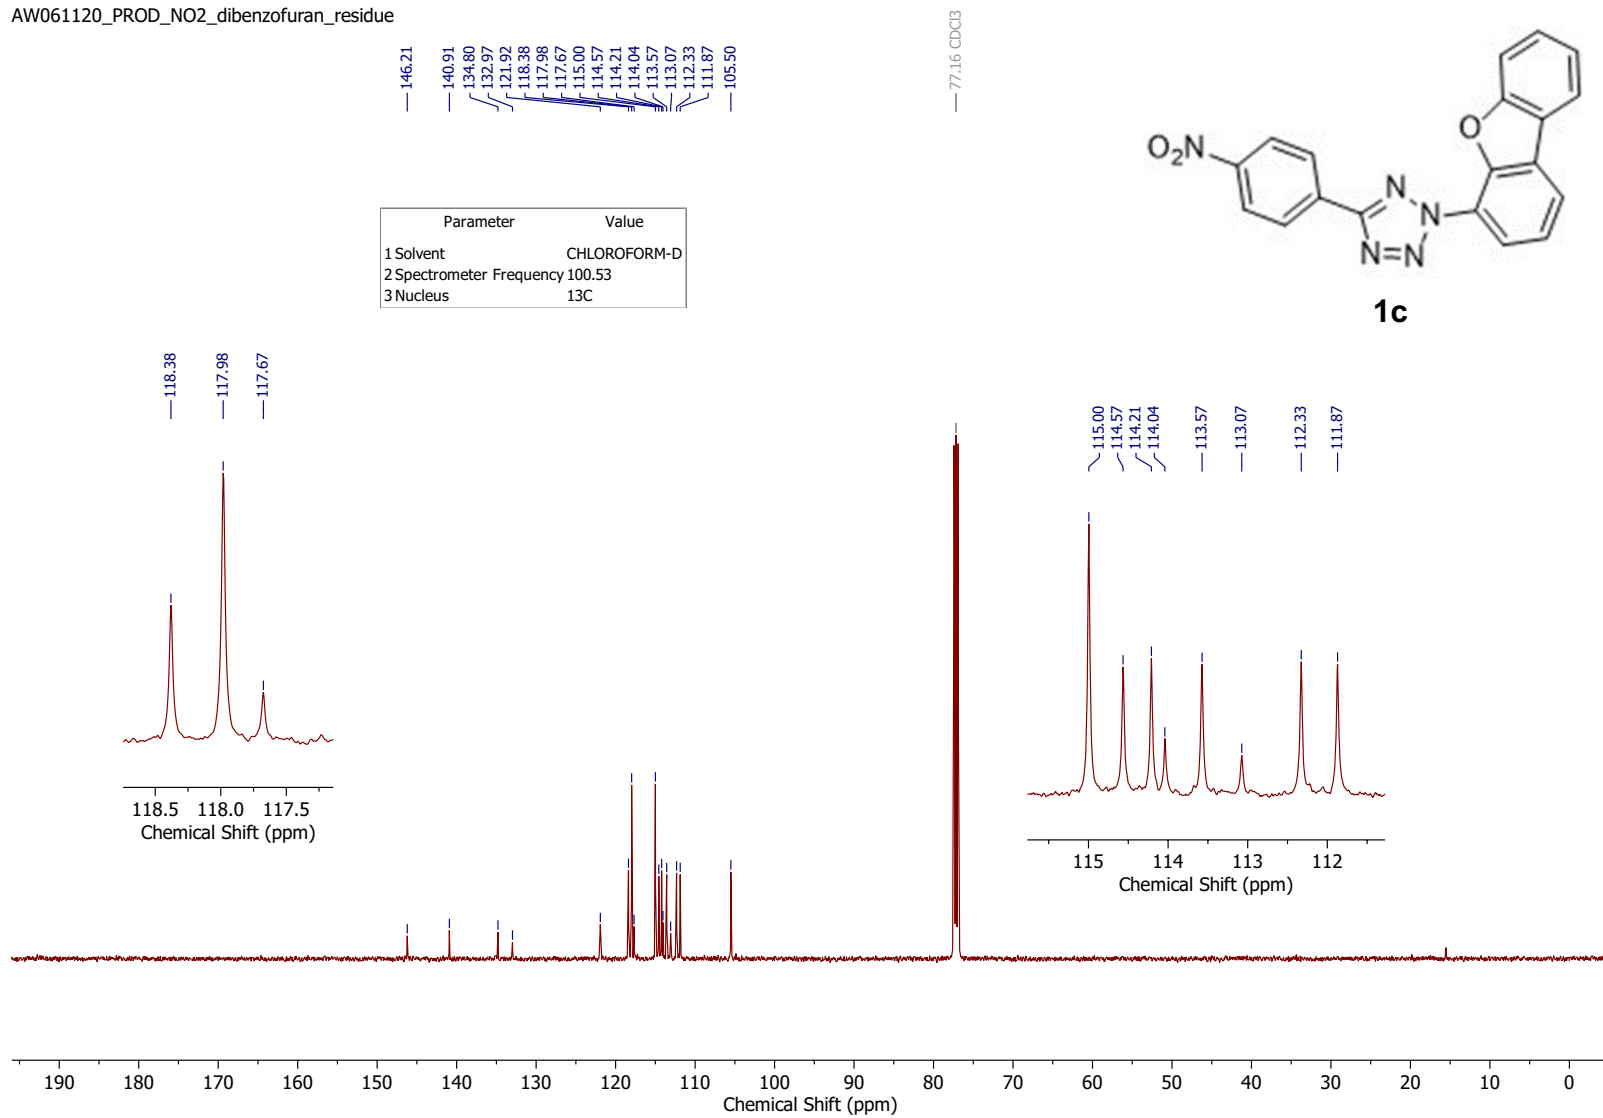

Figure S7. <sup>13</sup>C NMR spectra of **1c** in Chloroform-*d*

Residue\_from\_recrys

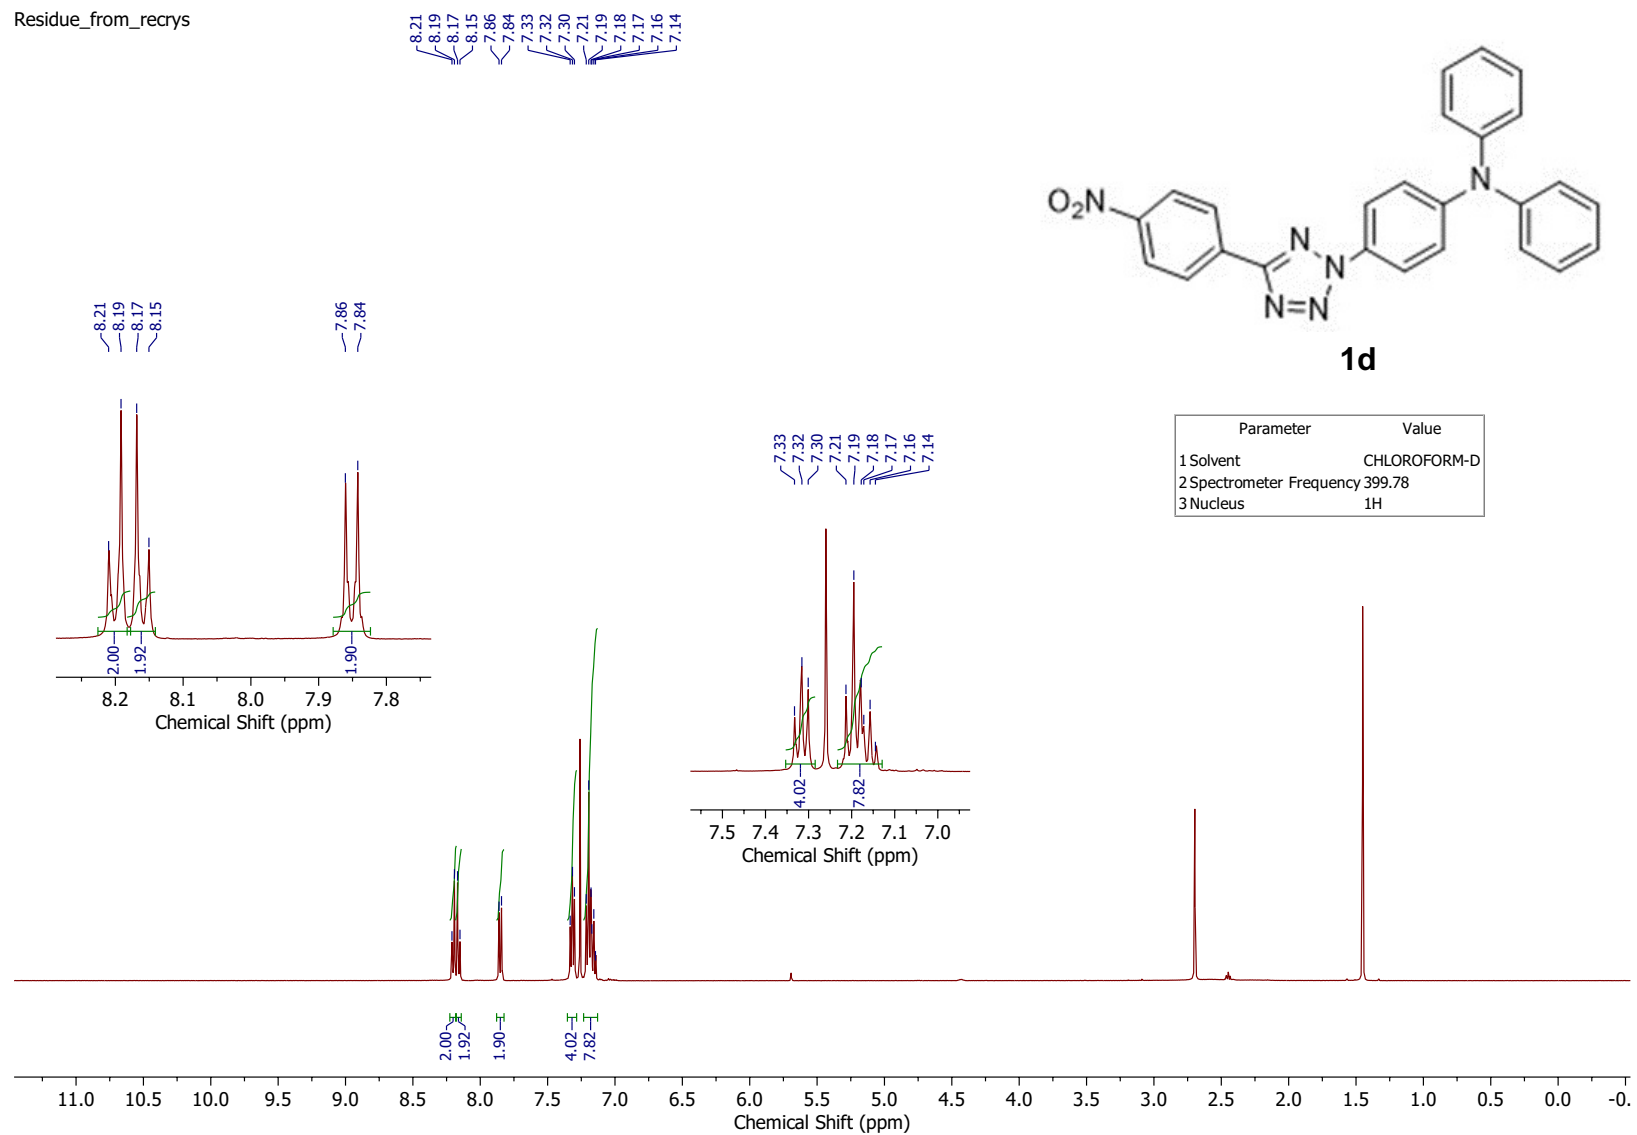

Figure S8. <sup>1</sup>H NMR spectra of **1d** in Chloroform-*d*

AW061220\_NO2\_diphenylaminobenzene\_residue

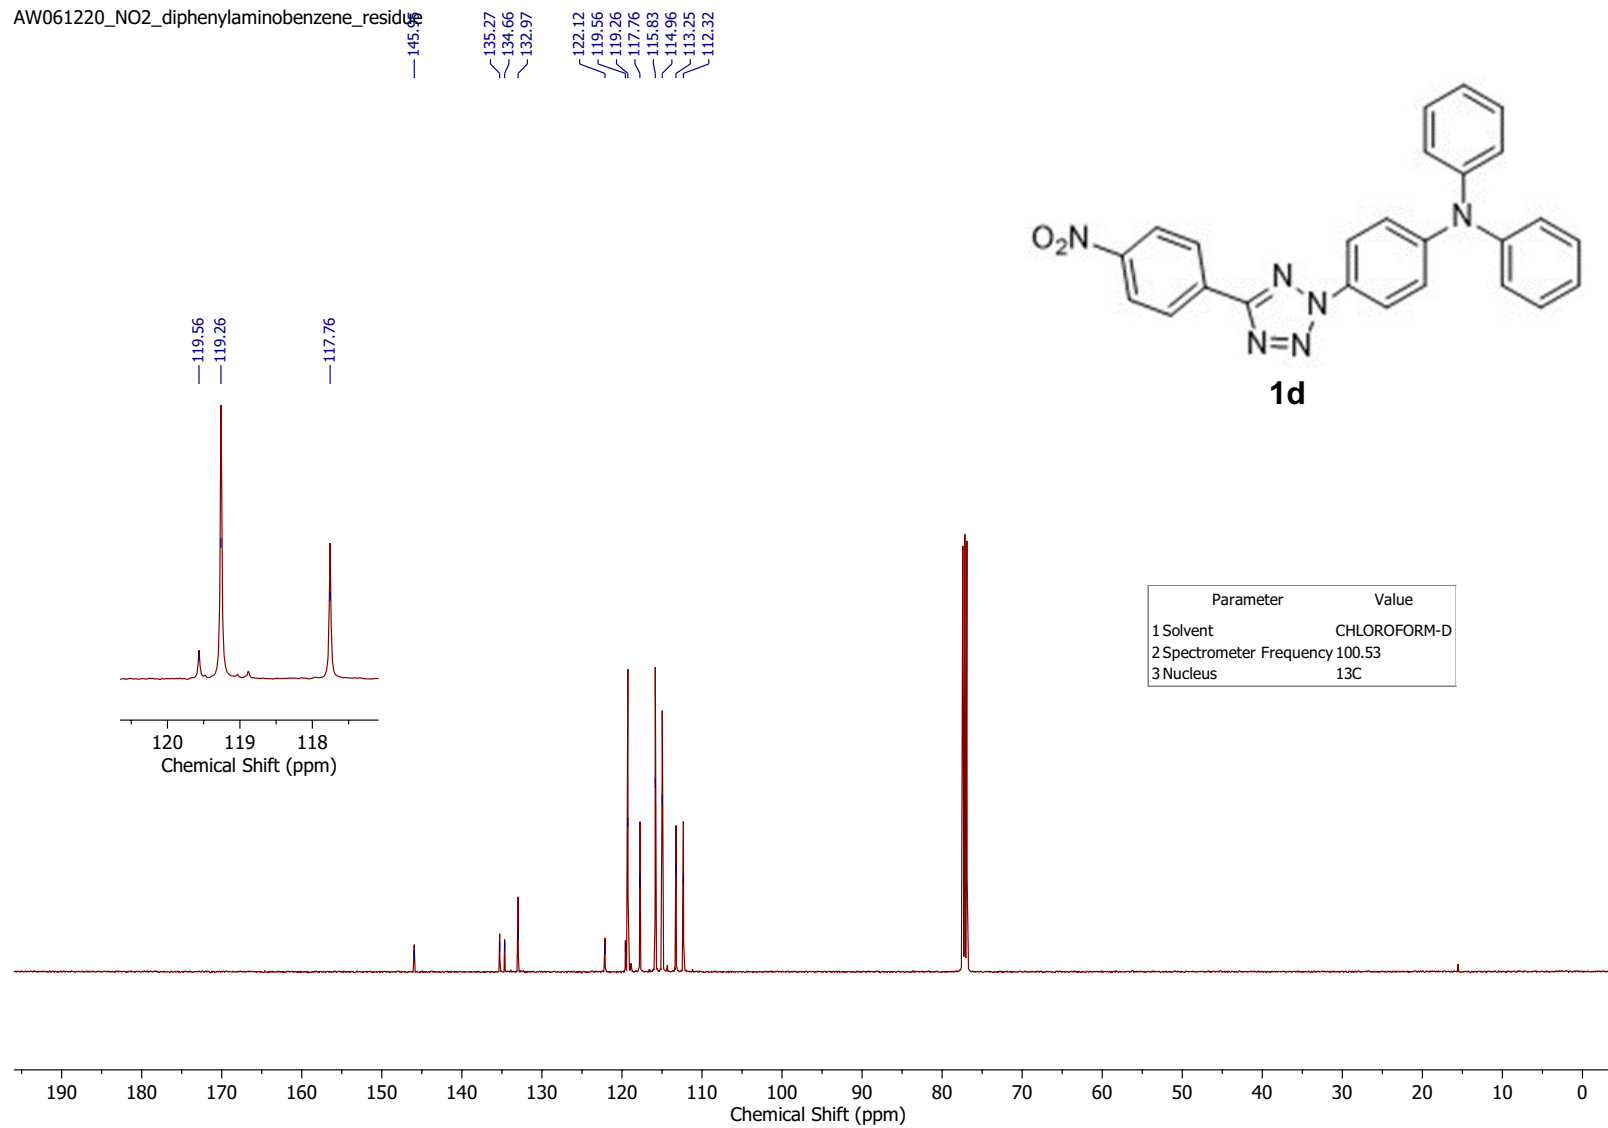

Figure S9. <sup>13</sup>C NMR spectra of **1d** in Chloroform-*d*
